# Supplementary material for: A CD4 T cell gene signature for early rheumatoid arthritis implicates interleukin 6-mediated STAT3 signalling, particularly in anti-citrullinated peptide antibody-negative disease
Source: HighWire-hosted journal article supplement (doi:10.1136/annrheumdis-2011-200968), 2012-04-24
Supplement: annrheumdis-2011-200968_ds2.xls [file annrheumdis-2011-200968_ds2.xls]

## Sheet: ReadMe
This Excel file contains "Gene-lists 1 - 9" as referenced in text of main manuscript or supplementary
methods, each list being located on separate tab-labelled sheets.
In lists 1-4 the "Illumina ID" column contains the probe address number on the Illumina WG6 (v3) BeadChip
(http://www.illumina.com/support/annotation_files.ilmn).
Where >1 "differentially expressed" Illumina probes appearing in a given list corresponded to a single gene entity,
duplicates were removed.
Uncorrected p-values are given in lists 1 - 4.
Official gene symbols and RefSeq accession numbers are given for identification purposes.
Non-linearised fold-change values are given values >1 indicate genes up-regulated in RA relative to non-RA groups
in any given comparison. (Values <1 = down-regulated). For down-regulated values, linearised data may be
obtained by rendering the negative reciprocal of the non-linearised value; i.e FC of 0.75 => |FC| of -1.33.
Gene lists are ranked according to FC.
Any additional list-specific information is provided on the relevant sheet.

## Sheet: Gene-List 1
Gene-List 1: RA vs Non-RA, Training samples (n=111)
*Red entries => p<0.05 when corrected for multiple-testing (FDR)
**transcript CR743148 (Illumina Probe ID 6370082) has been retired from NCBI,
but the EST corresponds to splice variant(s) within the GPRIN3 gene (chromosome 4.90).
Illumina ID	Symbol	RefSeq	FC	uncorrected p*
2070168	CX3CR1	NM_001337.3	1.657	0.0308
6330725	BCL3	NM_005178.2	1.59	2.63e-05
4230102	SOCS3	NM_003955.3	1.55	3.36e-06
430438	MIAT	NR_003491.1	1.531	0.000239
3130301	PIM1	NM_002648.2	1.515	6.8e-06
3190609	SBNO2	NM_014963.2	1.465	1.15e-05
6280170	PDCD1	NM_005018.1	1.423	1.04e-05
6220288	PRDM1	NM_001198.2	1.415	0.000242
60470	STX11	NM_003764.2	1.386	0.00117
6620689	MTHFD2	NM_001040409.1	1.375	7.88e-05
1510553	DACT1	NM_016651.5	1.37	0.00763
4670193	PRF1	NM_005041.4	1.351	0.0465
1710070	ITGAM	NM_000632.3	1.339	0.0249
5700753	CEACAM1	NM_001024912.1	1.334	0.000235
160292	APOBEC3H	NM_181773.2	1.332	0.0017
6220195	BATF	NM_006399.2	1.326	0.000953
6370082	GPRIN3**	CR743148	1.321	0.00021
7200301	ARID5A	NM_212481.1	1.321	0.00388
4730523	IGFL2	NM_001002915.1	1.307	1.12e-07
4060358	ABCA1	NM_005502.2	1.299	0.00162
6550600	MYC	NM_002467.3	1.295	0.0425
6770673	SOCS2	NM_003877.3	1.287	0.011
670576	LOC731186	XM_001128760.1	1.283	2.28e-05
650452	PLCH2	NM_014638.2	1.275	0.00242
7560731	SNORA64	NR_002326.1	1.265	0.000326
1430598	FBXO32	NM_058229.2	1.264	0.00127
2070037	ICOS	NM_012092.2	1.263	0.00318
5490068	MCOLN2	NM_153259.2	1.26	0.0131
3800647	UGCG	NM_003358.1	1.258	0.00242
4230228	CDK5RAP3	NM_176095.1	1.257	0.0126
7650026	MUC1	NM_001044391.1	1.255	1.95e-05
2070288	MT1E	NM_175617.3	1.253	0.0171
1410408	ARID5B	NM_032199.1	1.248	0.000716
1510424	S100P	NM_005980.2	1.246	0.000653
3420128	AP3M2	NM_006803.2	1.246	0.00305
3190148	DDIT4	NM_019058.2	1.245	0.0281
160494	AQP9	NM_020980.2	1.243	0.0275
870202	TNFSF10	NM_003810.2	1.24	0.00949
2320129	CSDA	NM_003651.3	1.235	0.0405
2100215	MAF	NM_001031804.1	1.233	0.00222
6420731	SLC20A1	NM_005415.3	1.231	9.77e-05
10333	LOC731682	XM_001129369.1	1.229	0.0356
4540376	FAM13A1	NM_001015045.1	1.228	0.043
1850554	NPDC1	NM_015392.2	1.227	0.000194
3190092	LDHA	NM_005566.1	1.226	3.82e-05
4260372	GTSCR1	XM_496277.2	1.225	0.049
6250010	GPRIN3	NM_198281.2	1.223	0.0136
3840470	ST6GALNAC1	NM_018414.2	1.222	0.0141
4590446	MSL3L1	NM_078628.1	1.22	0.00221
5890524	LINS1	NM_181740.1	1.22	0.000796
7570600	FLJ33590	NM_173821.1	1.22	0.00361
3940390	TBXAS1	NM_001061.2	1.218	0.0186
450615	MT2A	NM_005953.2	1.216	0.000379
520278	FAM100B	NM_182565.2	1.214	0.00367
7050326	CDKN2D	NM_079421.2	1.214	0.000125
1400601	C20orf100	NM_032883.1	1.212	0.0142
5130382	CLDN5	NM_003277.2	1.212	0.0321
5700735	PARP9	NM_031458.1	1.211	0.00126
5910364	TYMS	NM_001071.1	1.211	0.00678
5900471	PTGER2	NM_000956.2	1.21	0.0115
2850291	GARNL4	NM_015085.3	1.209	0.00831
4180301	ZNF365	NM_014951.2	1.209	0.0192
4200541	FAM113B	NM_138371.1	1.209	0.000487
5090754	KIAA0101	NM_014736.4	1.208	0.00994
7100372	PRPF4B	NM_003913.3	1.206	0.0112
5420538	TP53INP1	NM_033285.2	1.205	0.016
1510364	GBP5	NM_052942.2	1.204	0.0182
3800168	SLC2A3	NM_006931.1	1.204	0.0331
3840053	UGP2	NM_006759.3	1.204	0.000214
4610201	SNORA10	NR_002327.1	1.203	8.5e-05
6200168	PIM2	NM_006875.2	1.203	0.000135
2190689	OSBPL5	NM_020896.2	1.202	0.0208
2760112	P2RY5	NM_005767.4	1.201	0.00774
4670603	ELMO2	NM_133171.2	1.201	0.0101
3460008	TMEM173	NM_198282.1	1.2	0.000813
3780161	TMEM70	NM_017866.4	1.2	0.00548
5550066	CMAH	NR_002174.2	1.2	1.69e-05
3170703	LY9	NM_001033667.1	0.837	0.0043
5810746	MATN2	NM_002380.3	0.837	0.00284
5080615	IL16	NM_172217.2	0.835	0.0262
160242	C13orf15	NM_014059.2	0.834	0.00866
6200019	KLRB1	NM_002258.2	0.831	0.0393
6280504	LOC100008589	NR_003287.1	0.83	0.0364
6280243	DNTT	NM_001017520.1	0.829	0.000589
5130692	DDX17	NM_030881.3	0.821	0.0105
2970730	MYADM	NM_001020820.1	0.819	0.0171
870056	FAM119B	NM_015433.2	0.816	0.00801
1580477	C11orf74	NM_138787.2	0.815	7.68e-05
2710309	ELA1	NM_001971.4	0.783	0.00177
50706	CD40LG	NM_000074.2	0.78	0.000441
1470762	AUTS2	NM_015570.1	0.779	0.0224
7570324	ID3	NM_002167.2	0.775	0.000522
2320253	USMG5	NM_032747.2	0.774	0.0236
6770603	NOG	NM_005450.2	0.755	3.14e-05
130609	FCGBP	NM_003890.1	0.707	0.00124
5080192	SERPINE2	NM_006216.2	0.657	0.00192

## Sheet: Gene-List 2
Gene-List 2: ACPA-neg RA vs OA, Pooled dataset (n=173)
*Red entries => p<0.05 when corrected for multiple-testing (FDR)
**transcript CR743148 (Illumina Probe ID 6370082) has been retired from NCBI,
but the EST corresponds to splice variant(s) within the GPRIN3 gene (chromosome 4.90).
Illumina ID	Symbol	RefSeq	FC	uncorrected p*
4230102	SOCS3	NM_003955.3	1.916	9.17e-09
6330725	BCL3	NM_005178.2	1.797	1.64e-05
3130301	PIM1	NM_002648.2	1.715	4.06e-06
510079	HLA-DRB4	NM_021983.4	1.701	0.0231
3190609	SBNO2	NM_014963.2	1.618	1.06e-05
1820594	HBEGF	NM_001945.1	1.607	0.00284
6220195	BATF	NM_006399.2	1.594	1.4e-05
6620689	MTHFD2	NM_001040409.1	1.561	1.42e-05
6290270	MNDA	NM_002432.1	1.558	0.0499
670010	LOC650298	XM_939387.1	1.555	0.033
60470	STX11	NM_003764.2	1.553	0.000765
6220288	PRDM1	NM_001198.2	1.531	0.000238
6550600	MYC	NM_002467.3	1.527	0.00645
6590377	RPS26	NM_001029.3	1.527	0.0216
3800647	UGCG	NM_003358.1	1.518	1.99e-05
4230201	CDKN1A	NM_000389.2	1.505	0.0136
1240152	CFD	NM_001928.2	1.499	0.0314
4670048	RPS26L	NR_002225.2	1.499	0.0372
1990300	SOCS1	NM_003745.1	1.49	0.0155
6270307	LOC644934	XM_930344.2	1.476	0.0265
6370082	GPRIN3**	CR743148	1.457	8.53e-05
4060358	ABCA1	NM_005502.2	1.454	0.000771
7200301	ARID5A	NM_212481.1	1.448	0.00212
3780161	TMEM70	NM_017866.4	1.442	3.84e-06
6770673	SOCS2	NM_003877.3	1.441	0.00609
2070037	ICOS	NM_012092.2	1.438	0.000297
670576	LOC731186	XM_001128760.1	1.435	6.02e-06
430438	MIAT	NR_003491.1	1.428	0.00396
6560376	RPS26L1	NR_002309.1	1.423	0.0367
6250010	GPRIN3	NM_198281.2	1.419	0.00082
1440736	LDLR	NM_000527.2	1.415	0.00256
870202	TNFSF10	NM_003810.2	1.404	0.000859
3710397	EFNA1	NM_004428.2	1.402	0.000713
2650192	C6orf105	NM_032744.1	1.399	0.000885
5870692	GPR132	NM_013345.2	1.399	0.0278
50672	GSTM1	NM_000561.2	1.394	0.0462
1510553	DACT1	NM_016651.5	1.374	0.0373
670255	GADD45A	NM_001924.2	1.373	0.0411
2320129	CSDA	NM_003651.3	1.369	0.0161
3940438	NCF1	NM_000265.4	1.369	0.0486
6960195	LOC650646	XM_942527.2	1.369	0.0456
6280458	BCL6	NM_001706.2	1.363	0.00517
520278	FAM100B	NM_182565.2	1.352	0.000191
160494	AQP9	NM_020980.2	1.349	0.0216
7400747	FAM89A	NM_198552.1	1.336	0.000375
6860347	FAM46C	NM_017709.3	1.334	0.0429
1430598	FBXO32	NM_058229.2	1.331	0.0017
2570291	IFNGR2	NM_005534.2	1.329	0.000131
3800168	SLC2A3	NM_006931.1	1.329	0.00763
3840470	ST6GALNAC1	NM_018414.2	1.329	0.00551
4670603	ELMO2	NM_133171.2	1.322	0.00404
270152	SLC7A5	NM_003486.5	1.321	0.0382
5700753	CEACAM1	NM_001024912.1	1.321	0.00359
1050068	F2RL1	NM_005242.3	1.316	0.00015
4810520	TRIB1	NM_025195.2	1.316	0.0366
5670465	ADM	NM_001124.1	1.313	0.0187
7050326	CDKN2D	NM_079421.2	1.313	2.36e-05
4730411	SFXN1	NM_022754.4	1.312	0.00143
5270097	LOC653853	XM_936029.1	1.309	0.00641
1510424	S100P	NM_005980.2	1.305	0.00177
3190092	LDHA	NM_005566.1	1.302	4.95e-05
5890524	LINS1	NM_181740.1	1.298	0.000974
3420128	AP3M2	NM_006803.2	1.296	0.00528
1030102	RGS16	NM_002928.2	1.295	0.000337
3190148	DDIT4	NM_019058.2	1.291	0.0213
3460008	TMEM173	NM_198282.1	1.287	0.000248
6280672	TMEM49	NM_030938.2	1.284	0.000283
5820020	PRDX3	NM_006793.2	1.282	0.0019
2470348	NFKBIZ	NM_001005474.1	1.281	0.00621
2470358	IFNGR1	NM_000416.1	1.279	0.00205
7560731	SNORA64	NR_002326.1	1.278	0.00259
1230201	CTLA4	NM_005214.3	1.277	0.00417
450348	GNG10	NM_001017998.2	1.276	9.6e-05
380056	B3GNT2	NM_006577.5	1.274	0.000643
1990753	SLA	NM_006748.1	1.271	0.0131
2600735	TLR6	NM_006068.2	1.271	0.00765
3840053	UGP2	NM_006759.3	1.271	0.000201
2070288	MT1E	NM_175617.3	1.27	0.0397
6270554	LGALS8	NM_201545.1	1.27	0.000789
2640341	FKBP5	NM_004117.2	1.269	0.00778
6660630	TP53INP1	NM_033285.2	1.266	0.00444
4590446	MSL3L1	NM_078628.1	1.265	0.00248
4610201	SNORA10	NR_002327.1	1.265	0.00016
4010097	FBXO5	NM_012177.2	1.264	0.000131
1260086	ID2	NM_002166.4	1.263	0.014
7320041	GALNAC4S-6ST	NM_015892.2	1.262	0.0289
4670414	TMEM140	NM_018295.2	1.261	0.00276
3870706	FURIN	NM_002569.2	1.259	0.00518
1410408	ARID5B	NM_032199.1	1.258	0.00417
4200541	FAM113B	NM_138371.1	1.258	0.000767
4590228	GLRX	NM_002064.1	1.258	0.00719
20446	CEBPB	NM_005194.2	1.257	0.0108
1850554	NPDC1	NM_015392.2	1.257	0.00132
5550343	PDCL	NM_005388.3	1.253	0.000603
840554	RYBP	NM_012234.4	1.251	0.00531
1340075	BAG3	NM_004281.3	1.251	0.000391
4230554	REXO2	NM_015523.2	1.251	0.00173
5420564	NFIL3	NM_005384.2	1.251	0.0156
6220543	HIF1A	NM_001530.2	1.251	0.0068
70167	LY96	NM_015364.2	1.249	0.00105
4230619	GCA	NM_012198.2	1.249	0.0104
2760112	P2RY5	NM_005767.4	1.247	0.0114
6420731	SLC20A1	NM_005415.3	1.247	0.000324
7150280	LOC145853	XM_096885.9	1.247	1.21e-05
3420593	LMNB1	NM_005573.2	1.245	0.00222
4590349	ACVR2A	NM_001616.3	1.245	0.0009
630167	SDCBP	NM_001007067.1	1.244	0.0149
2750719	DDX21	NM_004728.2	1.243	0.00255
5130382	CLDN5	NM_003277.2	1.241	0.0235
1010653	POLR1C	NM_203290.1	1.239	0.00639
10630	IL21R	NM_181078.1	1.237	0.00733
5270167	GNL3	NM_206826.1	1.237	0.00236
6200168	PIM2	NM_006875.2	1.237	0.000751
3190112	SERPINB1	NM_030666.2	1.236	0.000149
6280170	PDCD1	NM_005018.1	1.236	0.0285
670086	MXD1	NM_002357.2	1.235	0.0026
2230379	NAMPT	NM_005746.2	1.232	0.0132
3890326	SOD2	NM_001024465.1	1.232	0.0147
4050681	NDUFV2	NM_021074.1	1.232	0.00154
6370414	CLECL1	NM_172004.2	1.232	0.0459
2060615	ACVR1B	NM_020328.2	1.23	0.000616
2710709	FCGR1B	NM_001017986.1	1.229	0.0434
5270110	EIF4A3	NM_014740.2	1.228	0.000397
4920110	GADD45B	NM_015675.2	1.227	0.00136
6380112	GRAMD4	NM_015124.2	1.227	0.000299
2190452	PIM3	XM_938171.2	1.225	0.00047
5900274	EDA	NM_001005611.1	1.225	0.000448
2630400	CSTF2T	NM_015235.2	1.224	0.00143
7150176	MAT2A	NM_005911.4	1.224	0.00517
5080021	BIRC3	NM_001165.3	1.22	0.00923
4260019	NGRN	NM_016645.2	1.218	0.0008
4810615	SLC25A44	NM_014655.1	1.218	0.00342
5870307	LOC440359	XM_496143.2	1.218	0.0223
1990630	TRIB3	NM_021158.3	1.217	0.0221
2600059	GNPDA1	NM_005471.3	1.215	0.0146
5900471	PTGER2	NM_000956.2	1.213	0.0365
3930390	SMAP2	NM_022733.1	1.212	0.00839
3420241	SLC2A14	NM_153449.2	1.211	0.0374
5360079	GIMAP5	NM_018384.3	1.211	0.00847
130452	GP5	NM_004488.1	1.21	0.000553
5810504	METRNL	NM_001004431.1	1.21	0.0219
4120131	KISS1R	NM_032551.3	1.209	0.00165
1030646	FLJ43692	NM_001003702.1	1.208	0.00793
4480504	ZNF828	NM_032436.1	1.207	0.00585
270601	HIAT1	NM_033055.2	1.206	0.0116
990735	RNF149	NM_173647.2	1.205	0.0033
3170091	GIMAP7	NM_153236.3	1.203	0.00101
3390612	TLR8	NM_016610.2	1.203	0.0404
1940524	STS-1	NM_032873.3	1.202	0.00732
4900575	PTRH2	NM_016077.3	1.202	0.0103
130021	IL2RA	NM_000417.1	1.2	0.00378
2100484	STAT3	NM_139276.2	1.2	0.00317
60079	DNAJB1	NM_006145.1	0.831	0.00833
3170703	LY9	NM_001033667.1	0.83	0.0178
7610440	XAF1	NM_199139.1	0.827	0.0389
4200475	MAST3	NM_015016.1	0.824	0.0359
770161	C10orf73	XM_096317.11	0.813	0.00616
870056	FAM119B	NM_015433.2	0.811	0.0225
3610300	CCDC58	NM_001017928.2	0.811	0.0149
5080615	IL16	NM_172217.2	0.806	0.0306
3990170	IFI27	NM_005532.3	0.799	0.0267
6770603	NOG	NM_005450.2	0.779	0.000954
7570324	ID3	NM_002167.2	0.75	0.00109
50706	CD40LG	NM_000074.2	0.739	0.000205
2230538	LRRN3	NM_001099660.1	0.578	0.0308

## Sheet: Gene-List 3
Gene-List 3: ACPA-pos RA vs OA, Pooled dataset (n=173)
*Red entries => p<0.05 when corrected for multiple-testing (FDR)
Illumina ID	Symbol	RefSeq	FC	uncorrected p*
5080692	HLA-A29.1	NM_001080840.1	1.961	0.0149
430438	MIAT	NR_003491.1	1.546	0.000406
3130301	PIM1	NM_002648.2	1.536	0.000107
6220288	PRDM1	NM_001198.2	1.485	0.000136
4230102	SOCS3	NM_003955.3	1.452	0.000601
6330725	BCL3	NM_005178.2	1.434	0.00186
6280170	PDCD1	NM_005018.1	1.427	1.73e-05
1400601	C20orf100	NM_032883.1	1.381	0.000272
4730523	IGFL2	NM_001002915.1	1.381	1.69e-08
6220195	BATF	NM_006399.2	1.372	0.00029
2070037	ICOS	NM_012092.2	1.37	7.7e-05
3190609	SBNO2	NM_014963.2	1.369	0.000182
5090754	KIAA0101	NM_014736.4	1.337	0.000717
5910364	TYMS	NM_001071.1	1.334	0.00037
6620689	MTHFD2	NM_001040409.1	1.332	0.000143
6370082		CR743148	1.331	6.9e-05
1990300	SOCS1	NM_003745.1	1.328	0.0283
1230201	CTLA4	NM_005214.3	1.326	0.000122
60470	STX11	NM_003764.2	1.311	0.00495
2070520	CDCA7	NM_031942.4	1.311	0.00086
3800647	UGCG	NM_003358.1	1.308	0.000353
130022	CDCA5	NM_080668.2	1.305	0.000177
7560731	SNORA64	NR_002326.1	1.3	6.93e-05
5420538	TP53INP1	NM_033285.2	1.29	0.00336
6250010	GPRIN3	NM_198281.2	1.288	0.00228
2570253	BTN3A2	NM_007047.3	1.285	0.017
4060358	ABCA1	NM_005502.2	1.282	0.00522
4260368	UBE2C	NM_181800.1	1.278	0.00038
10333	LOC731682	XM_001129369.1	1.274	0.00834
160292	APOBEC3H	NM_181773.2	1.274	0.0101
4230228	CDK5RAP3	NM_176095.1	1.273	0.0141
5420095	MYC	NM_002467.3	1.273	0.00207
670576	LOC731186	XM_001128760.1	1.272	5.19e-06
1850554	NPDC1	NM_015392.2	1.272	0.000954
3990619	TOP2A	NM_001067.2	1.269	0.000693
5360070	CCNB2	NM_004701.2	1.258	0.000841
3840470	ST6GALNAC1	NM_018414.2	1.256	0.00534
3780161	TMEM70	NM_017866.4	1.255	0.000225
520278	FAM100B	NM_182565.2	1.252	0.00317
1430598	FBXO32	NM_058229.2	1.246	0.00115
5890524	LINS1	NM_181740.1	1.246	0.000377
3610440	MAF	NM_005360.3	1.245	0.00787
6350189	MGC4677	NM_052871.3	1.239	0.0214
1500010	CDC20	NM_001255.2	1.236	0.000944
2320170	CDC45L	NM_003504.3	1.236	4.66e-05
5700753	CEACAM1	NM_001024912.1	1.236	0.0226
5340246	CRIP2	NM_001312.2	1.235	0.0179
1410408	ARID5B	NM_032199.1	1.234	0.00269
1690692	SOCS2	NM_003877.3	1.233	0.0309
2470348	NFKBIZ	NM_001005474.1	1.232	0.00421
4880646	FKSG30	NM_001017421.1	1.232	0.0191
1450056	CPA5	NM_080385.3	1.231	0.00564
1500553	NUSAP1	NM_018454.5	1.23	0.00215
1710019	ICA1	NM_004968.2	1.23	0.0016
4730411	SFXN1	NM_022754.4	1.225	0.000836
4810520	TRIB1	NM_025195.2	1.224	0.0324
4890750	DDX11	NM_030653.3	1.224	0.0376
2490161	CLEC2B	NM_005127.2	1.222	0.0378
10414	PTTG1	NM_004219.2	1.219	0.00173
1510364	GBP5	NM_052942.2	1.218	0.0161
380056	B3GNT2	NM_006577.5	1.216	0.000916
2940110	UHRF1	NM_001048201.1	1.216	0.00165
3190092	LDHA	NM_005566.1	1.215	9.71e-05
3420241	SLC2A14	NM_153449.2	1.21	0.00873
6100408	NLRC5	NM_032206.3	1.21	0.00475
7570600	FLJ33590	NM_173821.1	1.21	0.012
7650026	MUC1	NM_001044391.1	1.21	0.0017
450615	MT2A	NM_005953.2	1.209	0.00164
1450280	NCAPG	NM_022346.3	1.208	0.000123
160097	MELK	NM_014791.2	1.207	2.95e-05
4730196	TK1	NM_003258.2	1.207	0.000283
5090528	CYorf15B	NM_032576.2	1.207	0.0415
6480053	ATF4	NM_001675.2	1.206	0.0166
4610189	HERPUD1	NM_001010990.1	1.205	0.0217
4830056	ARPC5L	NM_030978.1	1.204	6.82e-05
3800168	SLC2A3	NM_006931.1	1.203	0.0313
5260600	ZNF655	NM_001009957.1	1.203	0.00963
7200301	ARID5A	NM_212481.1	1.202	0.0349
2600735	TLR6	NM_006068.2	1.201	0.0157
2760112	P2RY5	NM_005767.4	1.201	0.0133
2970730	MYADM	NM_001020820.1	0.818	0.0113
3610300	CCDC58	NM_001017928.2	0.815	0.0182
50706	CD40LG	NM_000074.2	0.81	0.00637
6770603	NOG	NM_005450.2	0.802	0.00116
7570324	ID3	NM_002167.2	0.757	8.06e-05
130609	FCGBP	NM_003890.1	0.688	0.00193
2230538	LRRN3	NM_001099660.1	0.679	0.0483
5080192	SERPINE2	NM_006216.2	0.628	0.0069
7050021	PRKAR1A	NM_002734.3	0.522	0.00561

## Sheet: Gene-List 4
Gene-List 4: Non-RA inflam. vs OA, Pooled dataset (n=173)
Illumina ID	Symbol	RefSeq	FC	uncorrected p*
3610743	SF1	NM_201997.1	1.658	0.0427
6960661	FAM118A	NM_017911.1	1.595	0.0349
1430113	LOC728505	XM_001127580.1	1.366	0.000994
1690440	XIST	NR_001564.1	1.358	0.013
6560376	RPS26L1	NR_002309.1	1.319	0.045
4060358	ABCA1	NM_005502.2	1.307	0.00185
5420095	MYC	NM_002467.3	1.302	0.00377
6960195	LOC650646	XM_942527.2	1.301	0.0432
3710397	EFNA1	NM_004428.2	1.251	0.0055
2570253	BTN3A2	NM_007047.3	1.246	0.0272
1940632	NCAPG2	NM_017760.5	1.238	0.0261
3800647	UGCG	NM_003358.1	1.233	0.00373
6590377	RPS26	NM_001029.3	1.226	0.0457
5490408	CEBPD	NM_005195.3	1.222	0.0436
3130296	AMY2A	NM_000699.2	1.221	0.0485
160370	TPM2	NM_213674.1	1.209	0.0474
3130301	PIM1	NM_002648.2	1.203	0.0173
1440736	LDLR	NM_000527.2	1.2	0.0263
6250010	GPRIN3	NM_198281.2	0.833	0.0147
1260086	ID2	NM_002166.4	0.814	0.0158
5890730	RPS26L	XR_017804.1	0.805	0.0405

## Sheet: Gene-List 5
Gene-List 5
				Biological Functions: proportion of genes
				in a given gene list assigned particular biological
Uniquely deregulated in ACPA-pos RA vs OA				function is given, along with p-value…
Symbol	RefSeq	FC		"Cell cycle" subset.		"Cancer" subset.
HLA-A29.1	NM_001080840.1	1.961		24/43 (p<10e-6)		21/43 (p<10e-6)
C20orf100	NM_032883.1	1.381
IGFL2	NM_001002915.1	1.381
KIAA0101	NM_014736.4	1.337		CCNB2		CCNB2
TYMS	NM_001071.1	1.334		CDC20		CDC20
CDCA7	NM_031942.4	1.311		CDC45L		CDCA5
CDCA5	NM_080668.2	1.305		CDCA5		CDCA7
UBE2C	NM_181800.1	1.278		CDCA7		FCGBP
APOBEC3H	NM_181773.2	1.274		CDK5RAP3		KIAA0101
LOC731682	XM_001129369.1	1.274		DDX11		MAF
CDK5RAP3	NM_176095.1	1.273		FCGBP		MELK
TOP2A	NM_001067.2	1.269		KIAA0101		MT2A
CCNB2	NM_004701.2	1.258		MAF		MUC1
MGC4677	NM_052871.3	1.239		MELK		NCAPG
CDC20	NM_001255.2	1.236		MT2A		PRKAR1A
CDC45L	NM_003504.3	1.236		MUC1		PTTG1
CRIP2	NM_001312.2	1.235		NCAPG		SERPINE2
FKSG30	NM_001017421.1	1.232		NUSAP1		TK1
CPA5	NM_080385.3	1.231		PRKAR1A		TOP2A
ICA1	NM_004968.2	1.23		PTTG1		TP53INP1
NUSAP1	NM_018454.5	1.23		SERPINE2		TYMS
DDX11	NM_030653.3	1.224		TK1		UBE2C
CLEC2B	NM_005127.2	1.222		TOP2A		UHRF1
MAF	NM_001031804.1	1.219		TYMS		UHRF1
PTTG1	NM_004219.2	1.219		UBE2C
GBP5	NM_052942.2	1.218		UHRF1
UHRF1	NM_001048201.1	1.216		ZNF655
FLJ33590	NM_173821.1	1.21
MUC1	NM_001044391.1	1.21
NLRC5	NM_032206.3	1.21
MT2A	NM_005953.2	1.209
NCAPG	NM_022346.3	1.208
CYorf15B	NM_032576.2	1.207
MELK	NM_014791.2	1.207
TK1	NM_003258.2	1.207
ATF4	NM_001675.2	1.206
HERPUD1	NM_001010990.1	1.205
ARPC5L	NM_030978.1	1.204
ZNF655	NM_001009957.1	1.203
MYADM	NM_001020820.1	0.818
FCGBP	NM_003890.1	0.688
SERPINE2	NM_006216.2	0.628
PRKAR1A	NM_002734.3	0.522

## Sheet: Gene-List 6
Gene-List 6
Uniquely deregulated in ACPA-neg RA vs OA					Biological Functions, Gene-List 6: proportion of genes in a given gene list assigned particular biological
									function is given, along with p-value…
SYMBOL	RefSeq	FC
						GREEN: "Survial" biological function; demonstrates overlap terms
HLA-DRB4	NM_021983.4	1.701		(Biological function lists follow below…)
HBEGF	NM_001945.1	1.607			Cell death		Apoptosis		Apoptosis	Survival	Survival
MNDA	NM_002432.1	1.558							(blood cells)		(blood cells)
LOC650298	XM_939387.1	1.555			44/114 (p<10e-10)		39/114 (p<10e-6)		12/114 (p<10e-6)	16/114	7/114 (p=4.6e-5)
CDKN1A	NM_000389.2	1.505								(p=7.5e-6-5.1e-3)
CFD	NM_001928.2	1.499
LOC644934	XM_930344.2	1.476			ACVR1B		ACVR1B		BIRC3	ACVR2A	BCL6
TNFSF10	NM_003810.2	1.404			ADM		ADM		CDKN1A	BCL6	CEBPB
C6orf105	NM_032744.1	1.399			BAG3		BAG3		CEBPB	CDKN1A	GADD45A
GPR132	NM_013345.2	1.399			BCL6		BCL6		GIMAP5	CDKN2D	HIF1A
GSTM1	NM_000561.2	1.394			BIRC3		BIRC3		GPR132	CEBPB	NFIL3
DACT1	NM_016651.5	1.374			CDKN1A		CDKN1A		HIF1A	FKBP5	PIM2
GADD45A	NM_001924.2	1.373			CDKN2D		CDKN2D		IFNGR1	GADD45A	TNFSF10
CSDA	NM_003651.3	1.369			CEBPB		CEBPB		IL2RA	GLRX
NCF1	NM_000265.4	1.369			CSDA		CSDA		MXD1	GSTM1
BCL6	NM_001706.2	1.363			DDIT4		DDIT4		NAMPT	HBEGF
RPS26L	XR_017804.1	1.362			DNAJB1		DNAJB1		SOD2	HIF1A
AQP9	NM_020980.2	1.349			EDA		EDA		TNFSF10	NFIL3
FAM46C	NM_017709.3	1.334			FKBP5		FKBP5			PIM2
IFNGR2	NM_005534.2	1.329			FURIN		GADD45A			S100P
SLC7A5	NM_003486.5	1.321			GADD45A		GIMAP5			SOD2
F2RL1	NM_005242.3	1.316			GIMAP5		GLRX			TNFSF10
ADM	NM_001124.1	1.313			GLRX		GNL3
LOC653853	XM_936029.1	1.309			GNL3		GPR132
S100P	NM_005980.2	1.305			GPR132		HBEGF
AP3M2	NM_006803.2	1.296			GSTM1		HIF1A
CDKN2D	NM_001800.3	1.296			HBEGF		IFNGR1
RGS16	NM_002928.2	1.295			HIF1A		IL2RA
DDIT4	NM_019058.2	1.291			HLA-DRB4		LGALS8
TMEM173	NM_198282.1	1.287			IFNGR1		LMNB1
TMEM49	NM_030938.2	1.284			IL2RA		MT1E
PRDX3	NM_006793.2	1.282			LGALS8		MXD1
IFNGR1	NM_000416.1	1.279			LMNB1		NAMPT
GNG10	NM_001017998.2	1.276			MT1E		NCF1
UGP2	NM_006759.3	1.271			MXD1		NDUFV2
MT1E	NM_175617.3	1.27			NAMPT		NFIL3
FKBP5	NM_004117.2	1.269			NCF1		PIM2
MSL3L1	NM_078628.1	1.265			NDUFV2		PRDX3
SNORA10	NR_002327.1	1.265			NFIL3		PTGER2
FBXO5	NM_012177.2	1.264			PIM2		PTRH2
GALNAC4S-6ST	NM_015892.2	1.262			PRDX3		RYBP
SLA	NM_001045556.1	1.262			PTGER2		SOD2
TMEM140	NM_018295.2	1.261			PTRH2		TNFSF10
FURIN	NM_002569.2	1.259			RYBP		TRIB3
FAM113B	NM_138371.1	1.258			S100P		XAF1
GLRX	NM_002064.1	1.258			SOD2
CEBPB	NM_005194.2	1.257			TMEM173
PDCL	NM_005388.3	1.253			TNFSF10
ELMO2	NM_182764.1	1.252			TRIB3
BAG3	NM_004281.3	1.251			XAF1
HIF1A	NM_001530.2	1.251
NFIL3	NM_005384.2	1.251
REXO2	NM_015523.2	1.251
RYBP	NM_012234.4	1.251
GCA	NM_012198.2	1.249
LY96	NM_015364.2	1.249
LOC145853	XM_096885.9	1.247
SLC20A1	NM_005415.3	1.247
ACVR2A	NM_001616.3	1.245
LMNB1	NM_005573.2	1.245
SDCBP	NM_001007067.1	1.244
DDX21	NM_004728.2	1.243
CLDN5	NM_003277.2	1.241
POLR1C	NM_203290.1	1.239
GNL3	NM_206826.1	1.237
IL21R	NM_181078.1	1.237
PIM2	NM_006875.2	1.237
SERPINB1	NM_030666.2	1.236
MXD1	NM_002357.2	1.235
CLECL1	NM_172004.2	1.232
NAMPT	NM_005746.2	1.232
NDUFV2	NM_021074.1	1.232
ACVR1B	NM_020328.2	1.23
FCGR1B	NM_001017986.1	1.229
EIF4A3	NM_014740.2	1.228
GADD45B	NM_015675.2	1.227
GRAMD4	NM_015124.2	1.227
EDA	NM_001005611.1	1.225
PIM3	XM_938171.2	1.225
CSTF2T	NM_015235.2	1.224
MAT2A	NM_005911.4	1.224
BIRC3	NM_001165.3	1.22
LOC440359	XM_496143.2	1.218
NGRN	NM_016645.2	1.218
SLC25A44	NM_014655.1	1.218
TRIB3	NM_021158.3	1.217
GNPDA1	NM_005471.3	1.215
SOD2	NM_001024466.1	1.215
PTGER2	NM_000956.2	1.213
LGALS8	NM_006499.3	1.212
SMAP2	NM_022733.1	1.212
GIMAP5	NM_018384.3	1.211
FAM89A	NM_198552.1	1.21
GP5	NM_004488.1	1.21
METRNL	NM_001004431.1	1.21
KISS1R	NM_032551.3	1.209
FLJ43692	NM_001003702.1	1.208
ZNF828	NM_032436.1	1.207
HIAT1	NM_033055.2	1.206
RNF149	NM_173647.2	1.205
GIMAP7	NM_153236.3	1.203
TLR8	NM_016610.2	1.203
PTRH2	NM_016077.3	1.202
STS-1	NM_032873.3	1.202
IL2RA	NM_000417.1	1.2
STAT3	NM_139276.2	1.2
DNAJB1	NM_006145.1	0.831
LY9	NM_001033667.1	0.83
XAF1	NM_199139.1	0.827
MAST3	NM_015016.1	0.824
C10orf73	XM_096317.11	0.813
FAM119B	NM_015433.2	0.811
IL16	NM_172217.2	0.806
IFI27	NM_005532.3	0.799

## Sheet: Gene-List 7
Gene-List 7
						Biological Functions, Gene-List 7: proportion of genes in a given gene list assigned particular biological
Deregulated in (ACPA-neg AND ACPA-pos RA) vs OA									function is given, along with p-value…
	(Biological function lists follow below…)
						Cell development			T-lymphocyte differentiation			T-lymphocyte development
*transcript CR743148 (Illumina Probe ID 6370082) has been retired from NCBI,
but the EST corresponds to splice variant(s) within the GPRIN3 gene (chromosome 4.90).						14/40 (p<10e-10)				7/40 (2.6e-7)			9/40 (3.14e-7)
Symbol	RefSeq	ACPA-neg RA vs OA	ACPA-pos RA vs OA			BATF				BCL3			BCL3
SOCS3	NM_003955.3	1.916	1.452			BCL3				CD40LG			CD40LG
BCL3	NM_005178.2	1.797	1.434			CD40LG				CTLA4			CTLA4
SBNO2	NM_014963.2	1.618	1.369			CEACAM1				ICOS			ICOS
BATF	NM_006399.2	1.594	1.372			CTLA4				ID3			ID3
MTHFD2	NM_001040409.1	1.561	1.332			ICOS				NOG			NOG
STX11	NM_003764.2	1.553	1.311			ID3				SOCS3			PDCD1
SOCS1	NM_003745.1	1.49	1.328			NOG							SOCS1
GPRIN3*	CR743148	1.457	1.331			PDCD1							SOCS3
ARID5A	NM_212481.1	1.448	1.202			PRDM1
TMEM70	NM_017866.4	1.442	1.255			SFXN1
ICOS	NM_012092.2	1.438	1.37			SOCS1
LOC731186	XM_001128760.1	1.435	1.272			SOCS2
MIAT	NR_003491.1	1.428	1.546			SOCS3
SOCS2	NM_003877.3	1.403	1.233
FAM100B	NM_182565.2	1.352	1.252
FBXO32	NM_058229.2	1.331	1.246
SLC2A3	NM_006931.1	1.329	1.203
ST6GALNAC1	NM_018414.2	1.329	1.256
PRDM1	NM_182907.1	1.328	1.335
CEACAM1	NM_001024912.1	1.321	1.236
TRIB1	NM_025195.2	1.316	1.224
SFXN1	NM_022754.4	1.312	1.225
LDHA	NM_005566.1	1.302	1.215
LINS1	NM_181740.1	1.298	1.246
NFKBIZ	NM_001005474.1	1.281	1.232
SNORA64	NR_002326.1	1.278	1.3
CTLA4	NM_005214.3	1.277	1.326
B3GNT2	NM_006577.5	1.274	1.216
TLR6	NM_006068.2	1.271	1.201
TP53INP1	NM_033285.2	1.266	1.278
ARID5B	NM_032199.1	1.258	1.234
NPDC1	NM_015392.2	1.257	1.272
P2RY5	NM_005767.4	1.247	1.201
PDCD1	NM_005018.1	1.236	1.427
SLC2A14	NM_153449.2	1.211	1.21
CCDC58	NM_001017928.2	0.811	0.815
NOG	NM_005450.2	0.779	0.802
ID3	NM_002167.2	0.75	0.757
CD40LG	NM_000074.2	0.739	0.81
LRRN3	NM_001099660.1	0.578	0.679

## Sheet: Gene-List 8
Gene-List 8
										Biological Functions, Gene-List 8: proportion of genes in a given gene list assigned particular biological
Lists of Functionally-related Genes based on Pathway analysis of Lists 5, 6 and 7 combined (n=197)												function is given, along with p-value…
	(Uniquely de-regulated in RA vs OA, but not in inflammatory controls; see text).									Cell death	Cell Survival	Cell Proliferation	T-cell proliferation	Blood cell	T-cell
														differentiation	differentiation
Canonical Pathways. Proportion of genes listed in particular pathway that appear is given in each										97/197	79/197	67/197	17/197	25/197	15/197
		case, along with p-value for significance…								(p=2.31e-23)	(p=2.97e-7)	(p=2.28e-20)	(p=2.27e-7)	(p=4.5e-12)	(p=3.3e-09)
T Helper Cell		Cell cycle		Interferon		JAK/STAT		IL-9		ACVR1B	ACVR2A	ACVR2A	B3GNT2	ACVR1B	BCL3
Differentiation		(G2/M DNA damage		signalling		signalling		signalling		ACVR2A	ADM	ADM	BATF	ACVR2A	BCL6
		checkpoint regulation)								ADM	AP3M2	ARID5B	CD40LG	BCL3	CD40LG
										AP3M2	ATF4	ATF4	CDKN1A	BCL6	CEBPB
6/41 (p=2.63e-4)		4/43(p=3.25e-4)		3/30 (p=1.8e-3)		4/64 (p=1.97e-03)		3/37		BAG3	BCL3	B3GNT2	CEACAM1	CD40LG	CTLA4
								(p=2.44e-03)		BCL3	BCL6	BATF	CLECL1	CDKN2D	GIMAP5
										BCL6	CCNB2	BCL3	CTLA4	CEBPB	ICOS
ICA1		CCB2		IFNGR1		CDKN1A		BCL3		BIRC3	CD40LG	BCL6	F2RL1	CTLA4	ID3
IFNGR1		CDKN1A		IFNGR2		SOCS1		SOCS2		CCNB2	CDC20	CD40LG	GADD45A	GIMAP5	IFNGR2
IFNGR2		GADD45A		SOCS1		SOCS2		SOCS3		CD40LG	CDCA5	CDC45L	ICOS	HIF1A	IL21R
SOCS1		TOP2A				SOCS3				CDC20	CDCA7	CDCA7	IFNGR1	ICOS	IL2RA
SOCS2										CDC45L	CDKN1A	CDKN1A	IL2RA	ID3	MAF
SOCS3										CDCA5	CDKN2D	CDKN2D	PDCD1	IFNGR2	MUC1
										CDCA7	CEACAM1	CEACAM1	PRDM1	IL21R	NOG
										CDK5RAP3	CEBPB	CEBPB	SOCS1	IL2RA	SOCS3
										CDKN1A	CFD	CLECL1	SOCS3	MAF
										CDKN2D	CTLA4	CRIP2	TNFSF10	MUC1
										CEACAM1	DDIT4	CSDA		NOG
										CEBPB	FCGBP	CTLA4		PDCD1
										CFD	FKBP5	DDX11		PRDM1
										CSDA	FURIN	DDX21		PRDX3
										CTLA4	GADD45A	F2RL1		SFXN1
										DDIT4	GLRX	FKBP5		SOCS1
										DNAJB1	GPR132	FURIN		SOCS3
										EDA	GSTM1	GADD45A		TNFSF10
										FBXO32	HBEGF	GNL3
										FCGBP	HERPUD1	GPR132
										FKBP5	HIF1A	GSTM1
										FURIN	HLA-DRB4	HBEGF
										GADD45A	ICOS	HIF1A
										GIMAP5	IFI27	ICOS
										GLRX	IFNGR1	ID3
										GNL3	IFNGR2	IFNGR1
										GPR132	IL2RA	IL16
										GSTM1	KIAA0101	IL21R
										HBEGF	LDHA	IL2RA
										HERPUD1	LGALS8	KIAA0101
										HIF1A	MAF	KISS1R
										HLA-DRB4	MAT2A	LDHA
										ICOS	MELK	LY96
										ID3	MT1E	MT2A
										IFI27	MT2A	MUC1
										IFNGR1	MTHFD2	MXD1
										IFNGR2	MUC1	NAMPT
										IL2RA	MXD1	NCF1
										KIAA0101	NAMPT	NOG
										LDHA	NCAPG	NPDC1
										LGALS8	NDUFV2	PDCD1
										LMNB1	NFIL3	PIM2
										MAF	NOG	PRDM1
										MAT2A	NPDC1	PRDX3
										MELK	PIM2	PRKAR1A
										MT1E	PRDX3	PTGER2
										MT2A	PRKAR1A	PTTG1
										MTHFD2	PTGER2	S100P
										MUC1	PTTG1	SERPINE2
										MXD1	S100P	SLC7A5
										NAMPT	SDCBP	SOCS1
										NCAPG	SERPINB1	SOCS2
										NCF1	SERPINE2	SOCS3
										NDUFV2	SLC2A3	SOD2
										NFIL3	SLC2A14	TNFSF10
										NFKBIZ	SLC7A5	TP53INP1
										NOG	SOCS1	TRIB1
										NPDC1	SOCS2	TYMS
										PDCD1	SOCS3	UBE2C
										PIM2	SOD2	UHRF1
										PRDM1	TK1
										PRDX3	TNFSF10
										PRKAR1A	TOP2A
										PTGER2	TP53INP1
										PTRH2	TRIB1
										PTTG1	TYMS
										RYBP	UBE2C
										S100P	UHRF1
										SDCBP	XAF1
										SERPINB1
										SERPINE2
										SLC2A3
										SLC2A14
										SLC7A5
										SOCS1
										SOCS2
										SOCS3
										SOD2
										TK1
										TLR6
										TMEM173
										TNFSF10
										TOP2A
										TP53INP1
										TRIB1
										TRIB3
										TYMS
										UBE2C
										UHRF1
										XAF1

## Sheet: Gene-List 9
Gene-List 9: STAT3-INDUCIBLE GENES on ILLUMINA ARRAY
SOURCES:
http://www.broadinstitute.org/gsea/msigdb/geneset_page.jsp?geneSetName=V$STAT3_02&keywords=stat3
http://www.broadinstitute.org/gsea/msigdb/geneset_page.jsp?geneSetName=V$STAT3_01&keywords=stat3
http://rulai.cshl.edu/cgi-bin/TRED/tred.cgi?process=searchTFGene&sel_type=factor_name&factor_organism=
any&tx_search_terms=STAT3&target_organism=human&prom_quality=1&prom_quality=2&prom_quality=
3&prom_quality=4&prom_quality=5&bind_quality=0&submit=SEARCH
Symbol (Illumina)	RefSeq	Symbol (source database, if different)
A2M	NM_000014.4
ACCN1	NM_001094.4
ACCN4	NM_018674.3			Note, for hypergeometric probabilities,
ADM2	NM_024866.4			total number of "non-redundant" genes
ALKBH6	NM_198867.1	MGC14376		used as "population size" = 37,847
AP1S2	NM_003916.3
AP2B1	NM_001282.2
APBA1	NM_001163.2
ARF3	NM_001659.1
ARHGAP8	NM_181335.2
ARL6IP6	NM_152522.3	MGC33864
ARX	NM_139058.1
ASXL1	NM_015338.4
ATG3	NM_022488.3
AZIN1	NM_015878.4	OAZIN
B3GAT3	NM_012200.2
BCAM	NM_005581.3	LU
BCL2	NM_000633.2
BCL2L1	NM_138578.1
BCL7A	NM_001024808.1
BIRC5	NM_001168.2
BMI1	NM_005180.5
BMP4	NM_130851.1
BNC1	NM_001717.2
BTBD1	NM_001011885.1
C14orf179	NM_052873.1	MGC16028
C16orf85	NM_001001682.1	FLJ45530
C17orf91	NM_001001870.1	MGC14376
C5orf41	NM_153607.1	LOC153222
CA10	NM_020178.3
CALU	NM_001219.2
CAPZA1	NM_006135.1
CCL2	NM_002982.3
CCND1	NM_053056.2
CCND3	NM_001760.2
CD40	NM_152854.2	TNFRSF5
CDKN1A	NM_000389.2
CEBPB	NM_005194.2
CENTD1	NM_139182.1
CHRM1	NM_000738.2
CISH	NM_145071.1
CLDN5	NM_003277.2
COL4A3BP	NM_005713.1
CPA4	NM_016352.2
CPLX2	NM_006650.3
CRTAC1	NM_018058.4
CSRP1	NM_004078.1
CTGF	NM_001901.2
CXorf36	NM_024689.1	FLJ14103
CYP19A1	NM_000103.2
DDIT3	NM_004083.4
DERL2	NM_016041.3	F-LANA
EGR1	NM_001964.2
EGR3	NM_004430.2
EHHADH	NM_001966.2
EIF4E	NM_001968.2
EIF4G1	NM_198244.1
EIF5A	NM_001970.3
ELMO1	NM_130442.2
EPHA7	NM_004440.2
EXOC3	NM_007277.4	SEC6L1
FAS	NM_152872.1	TNFRSF6
FASN	NM_004104.4
FBN2	NM_001999.3
FBXL3	NM_012158.1	FBXL3A
FCGR1A	NM_000566.2
FLJ33387	NM_182526.1
FLRT1	NM_013280.4
FOS	NM_005252.2
FOSB	NM_006732.1
FOXO4	NM_005938.2	MLLT7
FUT8	NM_178156.1
GABRB1	NM_000812.2
GEN1	NM_182625.2	FLJ40869
GPC3	NM_004484.2
GPHN	NM_001024218.1
GRIN2D	NM_000836.2
HEYL	NM_014571.3
HMOX1	NM_002133.1
HNRPR	NM_005826.2
HOXB13	NM_006361.5
HOXB4	NM_024015.3
HOXB9	NM_024017.3
HOXC4	NM_014620.4
HOXC6	NM_153693.3
HS6ST3	NM_153456.2
HSP90AA1	NM_001017963.2	HSPCA
HSP90AB1	NM_007355.2	HSPCB
ICAM1	NM_000201.1
IGF1	NM_000618.2
IL10	NM_000572.2
IL18BP	NM_005699.2
IL2RA	NM_000417.1
IL6	NM_000600.1
IL6ST	NM_002184.2
IRF1	NM_002198.1
IRX5	NM_005853.4
JAK3	NM_000215.2
JUN	NM_002228.3
KAZALD1	NM_030929.3
KCNH3	NM_012284.1
KCNN2	NM_021614.2
KCNN3	NM_002249.4
KCNT2	NM_198503.2	SLICK
KIAA0146	NM_001080394.1
KIAA0913	NM_015037.2
KIRREL3	NM_032531.2
KPNB1	NM_002265.4
LBP	NM_004139.2
LRP2	NM_004525.2
LTA	NM_000595.2
LTBP1	NM_000627.2
MAFF	NM_012323.2
MAML1	XM_937023.1
MATN4	NM_030592.1
MBD6	NM_052897.3
MCL1	NM_021960.3
MEIS2	NM_172315.1
MIA2	NM_054024.3
MID1IP1	NM_021242.4	MIG12
MIS12	NM_024039.1
MLL	NM_005933.2
MNT	NM_020310.2
MOBKL2C	NM_201403.2
MTMR14	NM_001077525.1	FLJ22405
MUC1	NM_002456.4
MUC4	NM_018406.3
MYC	NM_002467.3
MYT1	NM_004535.2
NAPB	NM_022080.1
NAV2	NM_145117.3
NCAM1	NM_001076682.2
NCOA5	NM_020967.2
NDST2	NM_003635.2
NELL2	NM_006159.1
NFAM1	NM_145912.5
NOL3	NM_003946.3
NOS2A	NM_000625.3
NPAS4	NM_178864.2	NXF
NR1D1	NM_021724.2
NR4A1	NM_002135.3
OSM	NM_020530.3
OXTR	NM_000916.3
PAPD1	NM_018109.2
PCBP4	NM_033009.1
PGF	NM_002632.4
PIM1	NM_002648.2
PPFIA2	NM_003625.2
PRF1	NM_005041.4
PROS1	NM_000313.1
PTMS	NM_002824.4
RBPJ	NM_203283.1	PRBPSUH
RBPJL	NM_014276.2	RBPSUHL
REG1A	NM_002909.3
REM2	NM_173527.2	FLJ38964
RGS3	NM_134427.1
RIMS1	NM_014989.3
RND1	NM_014470.2
RNF213	NM_020914.3	C17ORF27
RORA	NM_002943.2
RPUSD4	NM_032795.1	FLJ14494
RSPO4	NM_001040007.1	R-SPONDIN
S100A14	NM_020672.1
SCUBE3	NM_152753.2
SDC1	NM_002997.4
SENP3	NM_015670.4
SERPING1	NM_001032295.1
SET	NM_003011.2
SGMS1	NM_147156.3	TMEM23
SHOX2	NM_006884.2
SLC35A5	NM_017945.2
SLC38A5	NM_033518.1
SLCO5A1	NM_030958.1
SMG7	NM_201569.1	C1ORF16
SOCS1	NM_003745.1
SOCS3	NM_003955.3
SOS1	NM_005633.2
SP6	NM_199262.2
SPON1	NM_006108.2
SPTBN2	NM_006946.1	APG3
ST7L	NM_138729.2
STRA13	NM_144998.2
SV2B	NM_014848.3
TAOK1	NM_020791.1	TAO1
TCF7L2	NM_030756.2
TIMP1	NM_003254.2
TIMP3	NM_000362.4
TJAP1	NM_080604.1	TJP4
TLR2	NM_003264.3
TM9SF1	NM_006405.5
TMEM158	NM_015444.2
TMEM180	NM_024789.3	C10ORF77
TMEM37	NM_183240.2	PR1
TNF	NM_000594.2
TNFRSF8	NM_001243.3
TNFSF18	NM_005092.2
TNRC6A	NM_014494.2	TNRC6
TRAF4	NM_004295.3
TRH	NM_007117.1
TRIB2	NM_021643.1
TRIP10	NM_004240.2
TSC22D4	NM_030935.3	THG-1
UBE4B	NM_006048.2
UBR1	NM_174916.1
UBR5	NM_015902.4	DD5
UBTF	NM_014233.2
UPK2	NM_006760.2
VCL	NM_014000.2
VEGFA	NM_003376.4	VEGF
VEZF1	NM_007146.2	ZNF161
VIP	NM_194435.1
VSNL1	NM_003385.4
WDR81	NM_152348.1	FLJ33817
WEE1	NM_003390.2
WNT4	NM_030761.3
YY1	NM_003403.3
ZBTB11	NM_014415.2
ZBTB17	NM_003443.1	ZNF151
ZBTB25	NM_006977.2	ZNF46
ZBTB9	NM_152735.3
ZC3H18	NM_144604.2	LOC124245
ZFP112	NM_001083335.1	ZNF228
ZFYVE9	NM_007324.2
ZHX2	NM_014943.3
ZNF296	NM_145288.1	ZNF342
ZNF395	NM_018660.2	PBF
